# Supplementary material for: Central Acting Hsp10 Regulates Mitochondrial Function, Fatty Acid Metabolism, and Insulin Sensitivity in the Hypothalamus
Source: MDPI journal article supplement (doi:10.3390/antiox10050711), 2021-04-30
Supplement: s1 [file s1]

**A**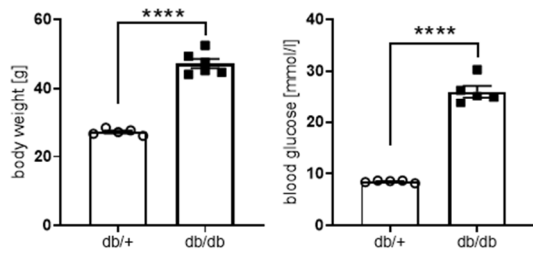**B**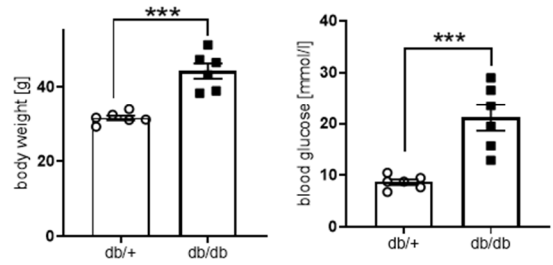

**Supplementary Figure S1.** Body weight and blood glucose levels of db/db mice. **(A)** Body weight and blood glucose levels of 14-week-old male db/+ and db/db mice used for Western blot analysis (Figure 1C, D). **(B)** Body weight and blood glucose levels of 14-week-old male db/+ and db/db mice used for Western blot analysis of Hsp10 and mRNA analysis of Hsp10 (Figure 1A,B). \*\*\*,  $p < 0.001$ , \*\*\*\*,  $p < 0.0001$  after two-tailed Student's t-test. All data are presented as mean  $\pm$  SEM.

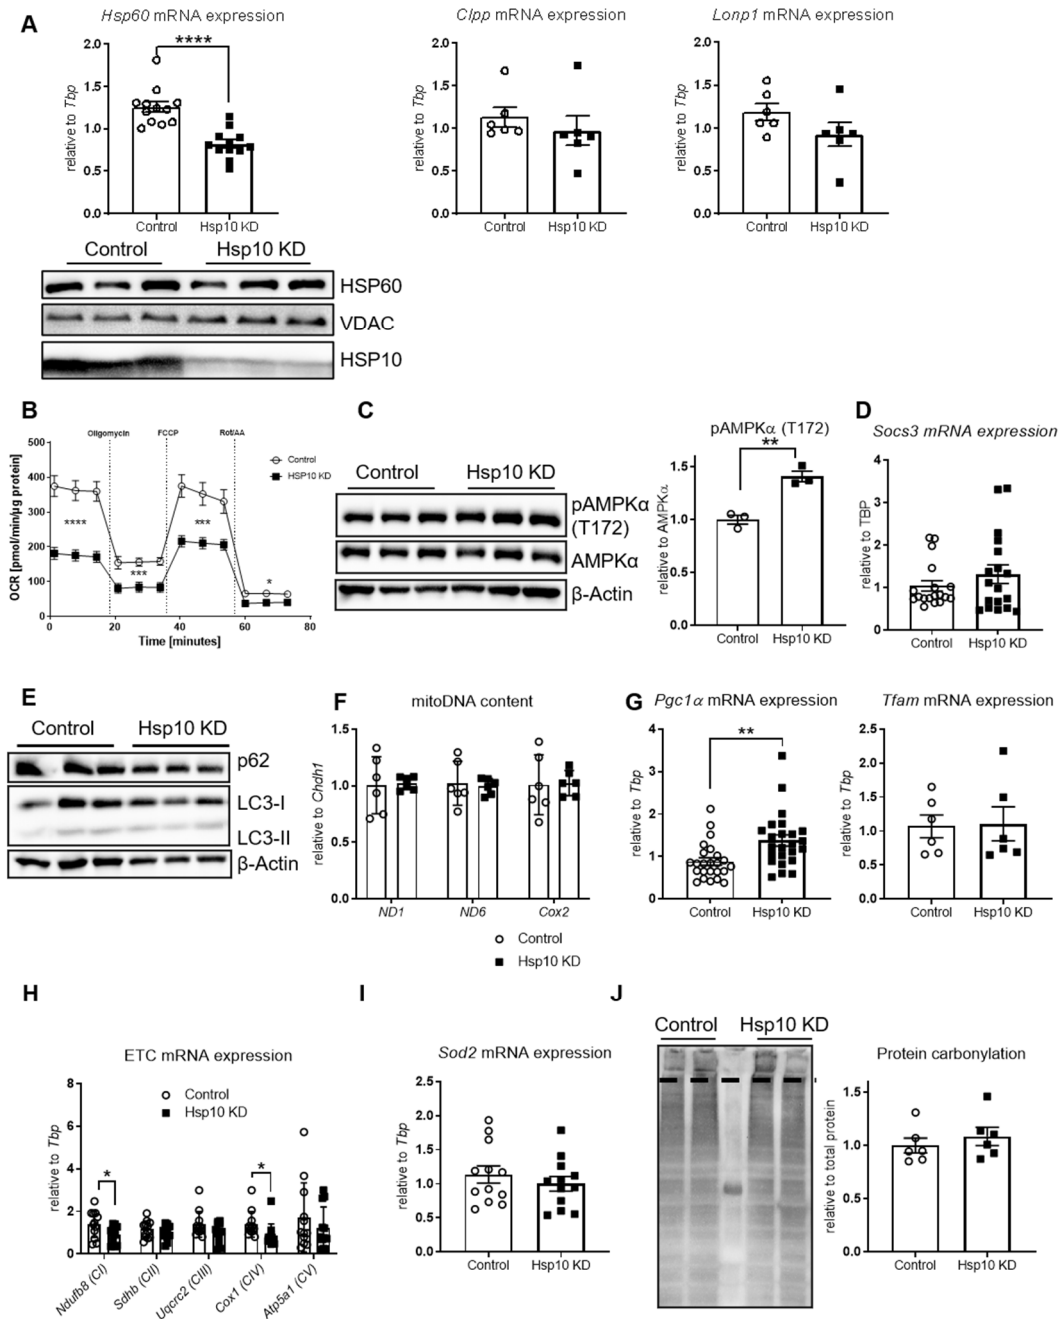

**Supplementary Figure S2.** Hsp10 KD in hypothalamic cells does not impact mitochondrial stress responses or cellular oxidative stress, but increases *Pgc1 $\alpha$*  gene expression. **(A)** (top left) mRNA expression and (bottom left) protein expression of Hsp60 of control and Hsp10 KD cells with additional verification of Hsp10 KD on protein level. VDAC as control for mitochondrial content. Representative blot of three independent experiments,  $n = 3$ . RT-PCR  $n = 18$ . (right) mRNA expression of *Clpp* and *Lonp1* of control and Hsp10 KD cells,  $n = 6$ . **(B)** Original bioenergetic profile of the seahorse data shown in Figure 2D. **(C)** Protein expression and densitometric analysis of pAMPK (T172) of control and Hsp10 KD.  $\beta$ -Actin served as a loading control  $n = 3$ . Representative blot from

three independent experiments. **(D)** mRNA expression of Socs3 of control and Hsp10 KD cells ( $n = 18$ ). **(E)** Protein expression of p62, LC3 I, and II for control and Hsp10 KD cells ( $n = 3$ ). **(F)** Mitochondrial DNA (mitoDNA) content of control and Hsp10 KD cells,  $n = 12$ . **(G)** mRNA expression of mitochondrial biogenesis marker Pgc1 $\alpha$  ( $n = 24$ ) and mitochondrial genome transcription activator Tfam ( $n = 6$ ) of control and Hsp10 KD cells. **(H)** mRNA expression of ETC complex subunits CI-CV of control and Hsp10 KD cells,  $n = 18$ . **(I)** mRNA expression of Sod2 of control and Hsp10 KD cells,  $n = 12$ . **(J)** Western blot and densitometric analysis of total protein carbonylation of control and Hsp10 KD cells. Representative blot from three different experiments. \*,  $p < 0.05$ , \*\*\*,  $p < 0.001$ , \*\*,  $p < 0.01$ , \*\*\*\*,  $p < 0.0001$  after two-tailed Student's t-test. All data are presented as mean  $\pm$  SEM.

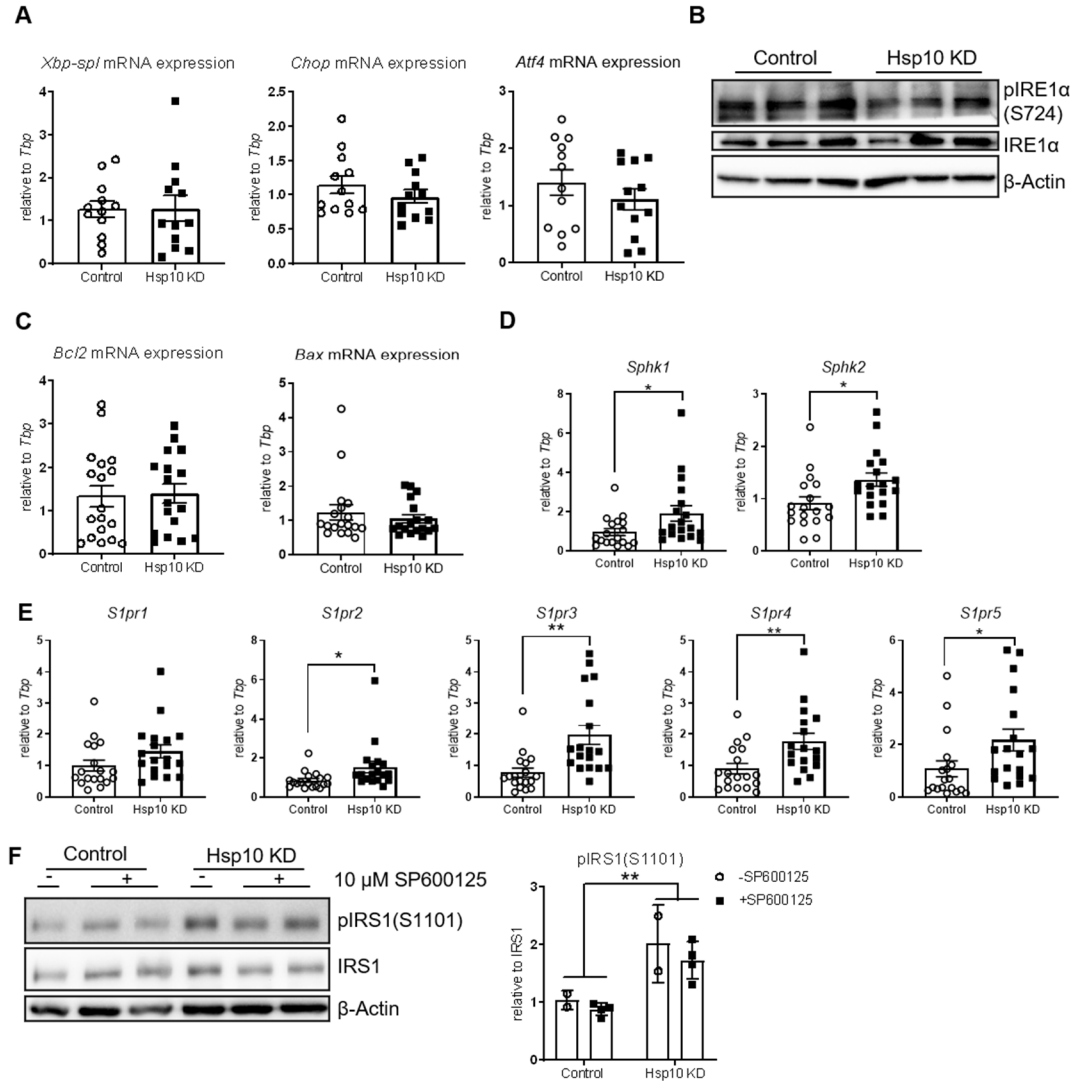

**Supplementary Figure S3.** Hsp10 KD in hypothalamic cells does not induce ER stress or apoptosis but impacts fatty acid metabolism and JNK inhibition does not rescue insulin resistance in Hsp10 KD cells. **(A)** mRNA expression of ER stress markers namely *Xbp-spliced*, *Chop* and *Atf4* of control and Hsp10 KD cells ( $n = 12$ ) and **(B)** protein expression of pIRE1 $\alpha$  (S724),  $n = 3$ . Representative Western blot of two independent experiments. **(C)** mRNA expression of apoptotic markers *Bcl2* and *Bax* of control and Hsp10 KD cells,  $n = 17-18$ . **(D)** mRNA expression of sphingosine kinase 1 and 2 (*Sphk1*, *Sphk2*) of control and Hsp10 KD cells,  $n = 17-18$ . **(E)** mRNA expression of Sphingosine-1-phosphate receptor isoforms 1-5 (*S1pr1-5*) of control and Hsp10 KD cells,  $n = 17-18$ . **(F)** Representative Western blot and pooled densitometric analysis of pIRS1(S1101) in control and Hsp10 KD cells after 19 h treatment of JNK inhibition with 10  $\mu$ M SP600125,  $n = 4$ . \*,  $p < 0.05$ , \*\*,  $p < 0.01$  after two-tailed Student's t-test. All data are presented as mean  $\pm$  SEM.

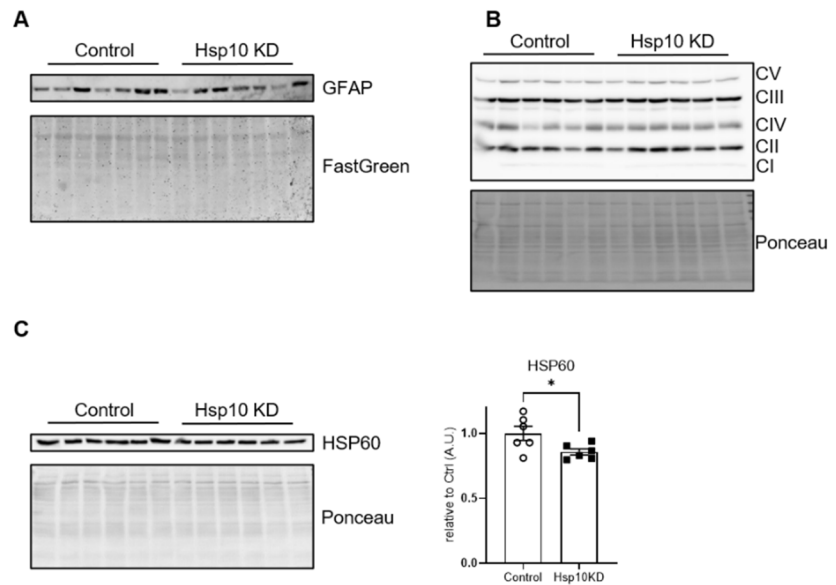

**Supplementary Figure S4.** Hsp10 KD mice do not exhibit increased GFAP expression in the hypothalamus and display only minor effects on markers of mitochondrial function in their livers. **(A)** Western blot of GFAP expression of arcuate nucleus samples of control and Hsp10 mice, FastGreen stain served as loading control,  $n = 7$ . **(B)** Western blot of mitochondrial OXPHOS complex subunits of CII-CV of liver samples of control and Hsp10 mice, Ponceau stain served as loading control,  $n = 6$ . **(C)** Western blot and densitometric analysis of Hsp60 of liver samples of control and Hsp10 mice, Ponceau stain served as loading control,  $n = 6$ . \*,  $p < 0.05$ , after two-tailed Student's t-test. All data are presented as mean  $\pm$  SEM.

Supplementary Table S1

| Primer               | Forward                  | Reverse                  |
|----------------------|--------------------------|--------------------------|
| <i>Acadl</i>         | GGTGGAACACGGAATGAAAGG    | GGCAATCGGACATCTTCAAAG    |
| <i>Acadm</i>         | TGTTAATCGGTGAAGGAGCAG    | CTATCCAGGGCATACTTCGTG    |
| <i>Acads</i>         | CCTGGGATGGGCTTCAAATAG    | GGTTCTCGGCATACTTCACAG    |
| <i>Atf4</i>          | CCTGAACAGCGAAGTGTTGG     | TGGAGAACCCATGAGGTTTCAA   |
| <i>Atp5a1</i> (CV)   | CATTGGTGATGGTATTGCGC     | TCCCAAACACGACAACCTCC     |
| <i>Bax</i>           | GGAGACACCTGAGCTGACCT     | CAGCAATCATCCTCTGCAGCTC   |
| <i>Bcl2</i>          | GTGTGGAGAGCGTCAACAGG     | CACAAAGGCATCCCAGCCTC     |
| <i>Chdh1</i>         | GCACAGTGGCCCTTAAATGT     | CCCTGCCTAAAATACCGTGA     |
| <i>Clpp</i>          | ATATACTCGAGGCTGTTGCG     | CCACCTGGGCTGTTGATATAC    |
| <i>Cox1</i> (CIV)    | GACACACGAGCTTACTTTAC     | GCTATGATAGCAAACACTGC     |
| <i>Cox2</i>          | CCTGGTGAACACTACGACTGCT   | GAATAACCCTGGTCGGTTTG     |
| <i>Ddit3</i> (CHOP)  | CTGCCTTTCACCTTGGAGAC     | CGTTTCCTGGGGATGAGATA     |
| <i>h_HSP10</i>       | GTATTGGTTGAAAGGAGTGCTG   | CACGCTAACTGGTTGAATCTCT   |
| <i>h_TBP</i>         | GCCATAAGGCATCATTGGAC     | AACAACAGCCTGCCACCTTA     |
| <i>Hprt</i>          | GCAGTCCCAGCGTCGTG        | GGCCTCCCATCTCCTTCAT      |
| <i>Hspd1</i> (Hsp60) | AGTGTTTCAGTCCATTGTCCC    | TGACTGCCACAACCTGAAG      |
| <i>Hspe1</i> (Hsp10) | CTGCCGAAACTGTAACCAAAG    | TCTCCAACCTTTCACACTGACAG  |
| <i>Lonp1</i>         | CTTCCGTTTCAGTGTTGGTG     | GGGTTCTCTGTCTTGGTCTTC    |
| <i>Mfn1</i>          | CATTGCGTTTCGGTTTTCCC     | GAAGGAGCAGTAGGAGTTGAAG   |
| <i>Mfn2</i>          | ATCAGTTACACCGGCTCTAAC    | GCCTCGACTTTCTTGTTTCATG   |
| <i>Nd1</i>           | GGATCCGAGCATCTTATCCA     | GGTGGTACTCCCGCTGTAAA     |
| <i>Nd6</i>           | ATTAAACAACCAACAAACCCAC   | TTTGGTTGGTTGTCTTGGGTT    |
| <i>Ndufb8</i> (CI)   | ACATCTCTTCGGCTTTGTGG     | CAGGCTCTTTGGTAGGATCAC    |
| <i>Opa1</i>          | GTGTGCTGGAAATGATTGCTC    | TGGTGAGATCAAATTCCCGAG    |
| <i>Pgc1α</i>         | AGCCGTGACCACTGACAACGAG   | GCTGCATGGTTCTGAGTGCTAAG  |
| <i>pLKO.1</i>        | CATATAGTATGGGCAAGCAGGG   | CTGTCTGAAGGGATGGTTGTAG   |
| <i>S1pr1</i>         | TTCTCATCTGCTGCTTCATCATCC | GGTCCGAGAGGGCTAGGTTG     |
| <i>S1pr2</i>         | TTACTGGCTATCGTGGCTCTG    | ATGGTGACCGTCTTGAGCAG     |
| <i>S1pr3</i>         | GCGTGTTCCTTCTGATTGG      | GCAAGATGGTAGAGCAGTC      |
| <i>S1pr4</i>         | CTGTCAGGGACTCGTACC       | CGTGAAGAGCAGACTGAAG      |
| <i>S1pr5</i>         | CCAACAGCTTGACGCGATCCCC   | GGTTGCTACTCCAGGACTGCCG   |
| <i>Sdhb</i> (CII)    | ACCCCTTCTCTGTCTACCG      | AATGCTCGCTTCTCCTTGTAAG   |
| <i>Sod2</i>          | TGCTCTAATCAGGACCCATTG    | CATTCTCCCAGTTGATTACATTCC |
| <i>Sphk1</i>         | AAAATACTGAGAACTCGGTCGG   | GCATCGCTTCTTAAAGTCCAGA   |
| <i>Sphk2</i>         | CACGGCGAGTTTGGTTCCTA     | CTTCTGGCTTTGGGCGTAGT     |
| <i>Tbp</i>           | CTGGAATTGTACCGCAGCTT     | ATGATGACTGCAGCAAATCG     |
| <i>Tfam</i>          | CACCCAGATGCAAACTTTTACG   | CTGCTCTTTATACTTGCTCACAG  |
| <i>Uqcrc2</i> (CIII) | TTCCAGTGACAGATGTCCAAG    | CTGTTGAAGGACGGTAGAAGG    |
| <i>Xbp-spliced</i>   | TGCTGAGTCCGCAGCAGGTG     | GCTGGCAGGCTCTGGGGAAG     |

**Supplementary Table S2.** Mass transitions for HPLC-MS/MS quantification of canonical and deuterated sphingolipids.

| Compound    | Precursor ion ( <i>m/z</i> ) |               | Product ion ( <i>m/z</i> ) |               | Collision energy (eV) |
|-------------|------------------------------|---------------|----------------------------|---------------|-----------------------|
|             | canonical                    | deuterated    | canonical                  | deuterated    |                       |
| Sph         | 300.3                        | 303.3         | 282.3                      | 285.3         | 8                     |
| dhSph       | 302.3                        | 305.3         | 284.3                      | 287.3         | 12                    |
| S1P         | 380.3                        | 383.3         | 264.3                      | 267.3         | 16                    |
| C16:0 Cer   | 520.5                        | 523.5 / 526.5 | 264.3                      | 267.3         | 25                    |
| C18:0 Cer   | 548.5                        | 551.5         | 264.3                      | 267.3         | 25                    |
| C20:0 Cer   | 576.6                        | 579.6         | 264.3                      | 267.3         | 25                    |
| C22:0 Cer   | 604.6                        | 607.6         | 264.3                      | 267.3         | 25                    |
| C24:0 Cer   | 632.6                        | 635.6         | 264.3                      | 267.3         | 25                    |
| C24:1 Cer   | 630.6                        | 633.6         | 264.3                      | 267.3         | 25                    |
| C16:0 dhCer | 540.5                        | 543.6 / 546.6 | 522.5                      | 525.5 / 528.5 | 15                    |
| C18:0 dhCer | 568.5                        | 571.5         | 550.5                      | 553.5         | 15                    |
| C20:0 dhCer | 596.6                        | 599.6         | 578.6                      | 581.5         | 15                    |
| C22:0 dhCer | 624.6                        | 627.6         | 606.6                      | 609.6         | 15                    |
| C24:0 dhCer | 652.7                        | 655.7         | 634.6                      | 637.6         | 15                    |
| C24:1 dhCer | 650.6                        | 653.6         | 632.6                      | 635.6         | 15                    |
| C16:0 SM    | 703.6                        | 706.6 / 709.6 | 184.1                      | 184.1         | 25                    |
| C18:0 SM    | 731.6                        | 734.6         | 184.1                      | 184.1         | 25                    |
| C20:0 SM    | 759.6                        | 762.6         | 184.1                      | 184.1         | 25                    |
| C22:0 SM    | 787.7                        | 790.7         | 184.1                      | 184.1         | 25                    |
| C24:0 SM    | 815.7                        | 818.7         | 184.1                      | 184.1         | 25                    |
| C24:1 SM    | 813.7                        | 816.7         | 184.1                      | 184.1         | 25                    |
| C16:0 dhSM  | 705.6                        | 708.6 / 711.6 | 184.1                      | 184.1         | 25                    |
| C18:0 dhSM  | 733.6                        | 736.6         | 184.1                      | 184.1         | 25                    |
| C20:0 dhSM  | 761.6                        | 764.6         | 184.1                      | 184.1         | 25                    |
| C22:0 dhSM  | 789.7                        | 792.7         | 184.1                      | 184.1         | 25                    |
| C24:0 dhSM  | 817.7                        | 820.7         | 184.1                      | 184.1         | 25                    |
| C24:1 dhSM  | 815.7                        | 818.7         | 184.1                      | 184.1         | 25                    |

The following mass transitions were used for internal standard compounds: *m/z* 307.3 → 289.3 for d<sub>7</sub>-Sph (8 eV), *m/z* 309.3 → 291.3 for d<sub>7</sub>-dhSph (12 eV), *m/z* 387.3 → 271.3 for d<sub>7</sub>-S1P (16 eV), *m/z* 534.5 → 264.3 for C17:0 Cer (applied for all Cer and dhCer species) and *m/z* 734.8 → 184.1 for C16:0 d<sub>31</sub>-SM (applied for all SM and dhSM species).

For C16:0 (dh)Cer and (dh)SM species d<sub>3</sub> and d<sub>6</sub>-labeled analogues might be formed after cell stimulation with palmitate-d<sub>3</sub>. All other sphingolipid species form d<sub>3</sub>-labeled analogues only. .

Sph, sphingosine; dhSph, dihydrosphingosine; S1P, sphingosine 1-phosphate; Cer, ceramide; dhCer, dihydroceramide; SM, sphingomyelin; dhSM, dihydrosphingomyelin.

## Supplementary Methods

### Cell Culture Stimulation Experiments

CLU-183 cells were stimulated with 10μM SP600125 (Sigma-Aldrich, St. Louis, MO, USA) for 19h in full media.
